# Supplementary material for: Understanding the synergistically enhanced thermocatalytic decomposition of ammonium perchlorate using cobalt nanoparticle-embedded nitrogen-doped graphitized carbon
Source: Royal Society of Chemistry journal article supplement (doi:10.1039/d2ma01038k), 2023-01-01
Supplement: d2ma01038k1.pdf [file d2ma01038k1.pdf]

## Supporting Information

# Understanding Synergistic Enhanced Thermocatalytic Decomposition of Ammonium Perchlorate by Cobalt Nanoparticles-embedded Nitrogen-doped Graphitized Carbon

Hong Lin,<sup>a</sup> Qingchun Zhang,<sup>a,b,\*</sup> Huiyu Liu,<sup>a</sup> Shiyong Shen,<sup>b,\*</sup> Zhiliang Guo,<sup>a</sup> Bo Jin,<sup>a,\*</sup> Rufang Peng<sup>a</sup>

<sup>a</sup> State Key Laboratory of Environment-friendly Energy Materials, School of Materials Science and Engineering, Southwest University of Science and Technology, Mianyang 621010, P. R. China

<sup>b</sup> Institute of Applied Physics and Materials Engineering, University of Macau, Macao SAR, 999078, P. R. China

\* Corresponding authors: zhangqingchun@swust.edu.cn (Q. Zhang), shiyingshen@um.edu.mo (S. Shen), jinbo0428@163.com (B. Jin); Tel.: +86-816-2419011

## 1 Experimental Section

**1.1 Materials and Equipment.** All the reagents and solvents used were all of the analytical grades and without further purification. 2-methylimidazole and  $\text{Co}(\text{NO}_3)_2 \cdot 6\text{H}_2\text{O}$  were purchased from Aladdin Biochemical Technology Co., Ltd. (Shanghai, China). Methanol was purchased from Chengdu Colon Chemical Co., Ltd. (Chengdu, China).

The X-ray diffraction (XRD) patterns were tested by a PANalytical X'Pert Pro X-ray diffractometer with monochromatized  $\text{Cu K}_\alpha$ . The microscopic morphologies were observed by Zeiss Supra 55VP field emission scanning electron microscope (FE-SEM) and Zeiss Libra 200 transmission electron microscope (TEM). The differential thermal analysis (DTA) was determined by using a WCR-2B differential thermal analyzer. The X-ray photoelectron spectroscopy (XPS) was used  $\text{Al K}_\alpha$  radiation to collect on scanning X-ray microprobe (Thermo ESCALAB 250XI, USA). The Brunner-Emmett-Teller (BET) surface areas and porous structure was measured using the ASAP 2460 volumetric analyzer from the  $\text{N}_2$  adsorption-desorption isotherm at 77 K. The inductively coupled plasma optical emission spectrometry (ICP-OES) was carried out with Agilent 5110. The precise weighing was carried on a Sartorius BT25S analytical balance that was accurate to 0.01 mg.

**1.2 The Preparation of ZIF-67 and Co-NPs@NC-T.** The ZIF-67 was prepared according to a previously reported method with little modifying<sup>1</sup>. First,  $\text{Co}(\text{NO}_3)_2 \cdot 6\text{H}_2\text{O}$  (5.82 g, 20.0 mmol) and 2-methylimidazole (6.16 g, 75.0 mmol) were separately dissolved in methanol (150 mL), and then which were mixed and continued to stir for 24 h under room temperature. The precipitates were collected by centrifuge and dried in a drying oven at 60 °C for 12 h to obtained ZIF-67 as purple power.

The Co-NPs@NC-T was prepared by calcining ZIF-67. The ZIF-67 precursor was placed in a tube

furnace and heated to 600 °C, 800 °C, and 1000 °C with a heating rate of 5 °C min<sup>-1</sup>, and then keep it constant for 2 h under argon atmosphere to respectively obtain Co-NPs@NC-600, Co-NPs@NC-800, and Co-NPs@NC-1000 as black power.

**1.3 Thermal Analysis.** The DTA was carried out with a WCR-2B differential thermal analyzer. The samples of AP with 2 wt%, 4 wt%, 6 wt%, 8 wt%, and 10 wt% Co-NPs@NC-*T* or ZIF-67 were prepared by careful addition of Co-NPs@NC-*T* or ZIF-67 in pure AP, and then the samples (3 mg) were respectively used for DTA test under a temperature range from room temperature to 500 °C with a heating rate of 10 K min<sup>-1</sup> and a nitrogen atmosphere flow with a rate of 35 mL min<sup>-1</sup>. The samples (3 mg) of pure AP and AP with 10 wt% Co-NPs@NC-*T* or ZIF-67 were used for DTA test under a temperature range from room temperature to 500 °C with a heating rate of 2, 5, 10, 15, and 20 K min<sup>-1</sup> and a nitrogen atmosphere flow with a rate of 35 mL min<sup>-1</sup>. The peak temperature of DTA was used to determine the kinetic parameters by Kissinger's method<sup>2</sup>. The integral area of the exothermic peak of DTA was used to determine the heat release.

**1.4 DFT Calculations.** All spin-polarized first-principles DFT calculations were performed using the Vienna ab initio simulation package. In order to describe the ion-electron interactions, projector-augmented wave (PAW) potentials were adopted. The Perdew-Burke-Ernzerhof (PBE) exchange-correlation functional within the generalized gradient approximation (GGA) was employed<sup>3-6</sup>. The energy cut-off for the plane-wave basis was set to 450 eV. A 3×3×1 grid k-point mesh by the Monkhorst-Pack method is used for geometry optimization and the static total energy calculations.[5] The influence of 3d electrons of Co atoms was considered and a DFT + U method was used as an on-site Coulomb correction. The parameter of (U-J) was set to 3.3 eV, which has been confirmed as a suitable value to avoid large computational resources without absurd results<sup>7, 8</sup>. To take into account the van der Waals interactions, the dispersion corrected DFT-D3 method was used<sup>9</sup>. The convergence thresholds for energy and atomic forces were set as 10<sup>-4</sup> eV and 0.02 eV Å<sup>-1</sup>, respectively.

## 2 Figures and Tables

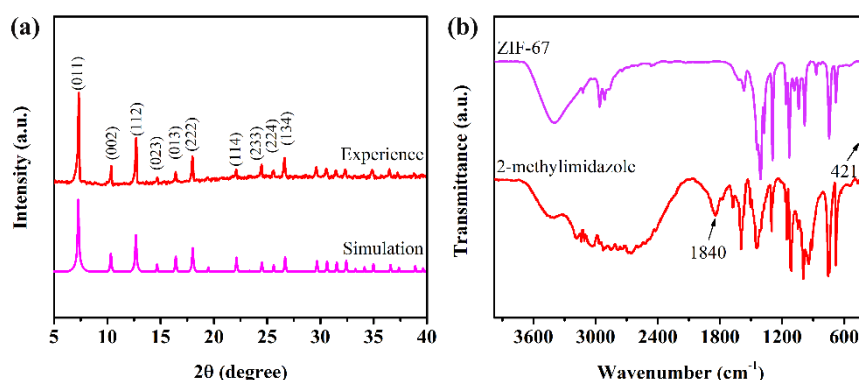

**Figure S1.** a) The experimental and simulative XRD of ZIF-67 precursor. b) The FTIR of ZIF-67 precursor and 2-

methylimidazole.

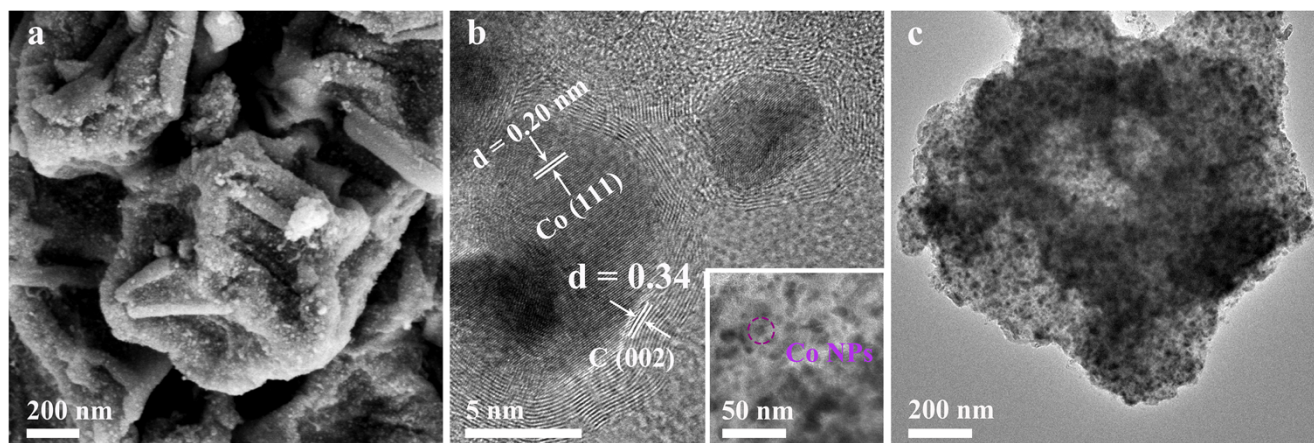

Figure S2. a) SEM, b) HRTEM, and c) TEM of Co-NPs@NC-600.

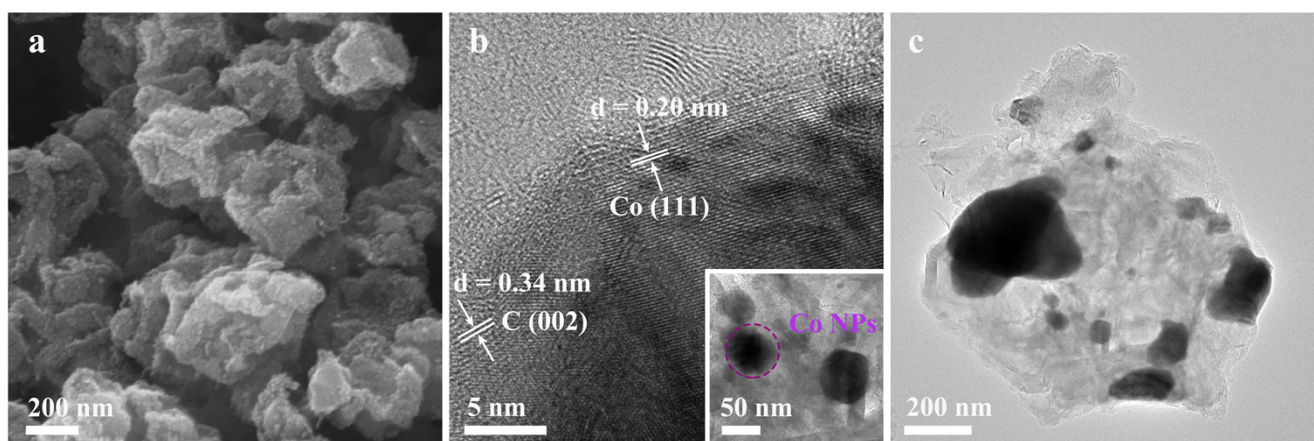

Figure S3. a) SEM, b) HRTEM, and c) TEM of Co-NPs@NC-1000.

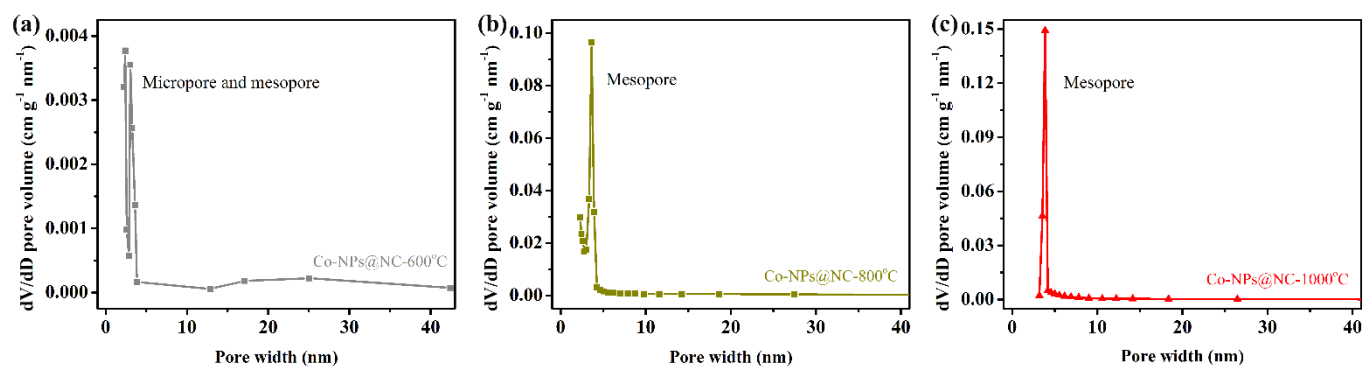

Figure S4. The pore size distributions of a) Co-NPs@NC-600, b) Co-NPs@NC-800, and c) Co-NPs@NC-1000.

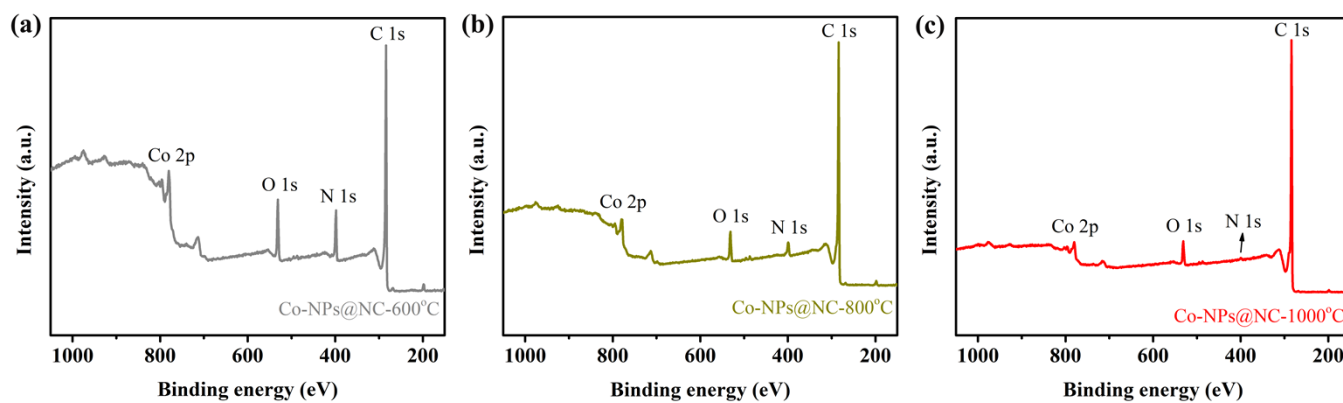

Figure S5. The XPS survey of a) Co-NPs@NC-600, b) Co-NPs@NC-800, and c) Co-NPs@NC-1000.

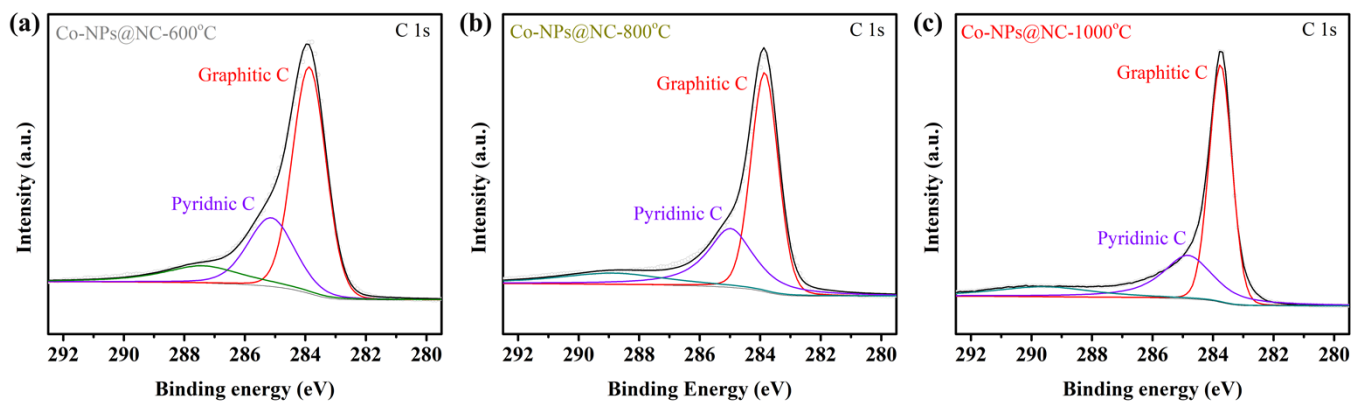

**Figure S6.** The high-resolution C 1s spectra of a) Co-NPs@NC-600, b) Co-NPs@NC-800, and c) Co-NPs@NC-1000.

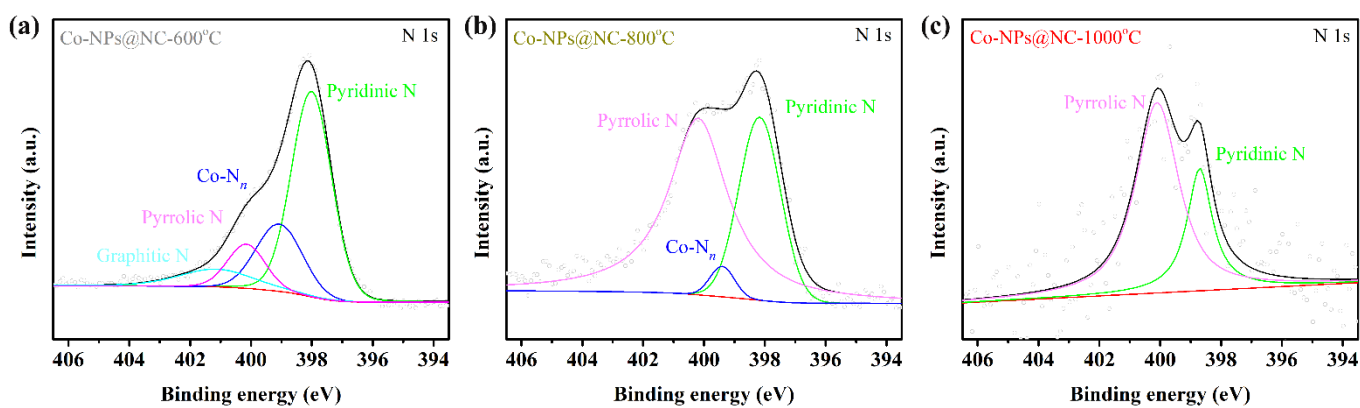

**Figure S7.** The high-resolution N 1s spectra of a) Co-NPs@NC-600, b) Co-NPs@NC-800, and c) Co-NPs@NC-1000.

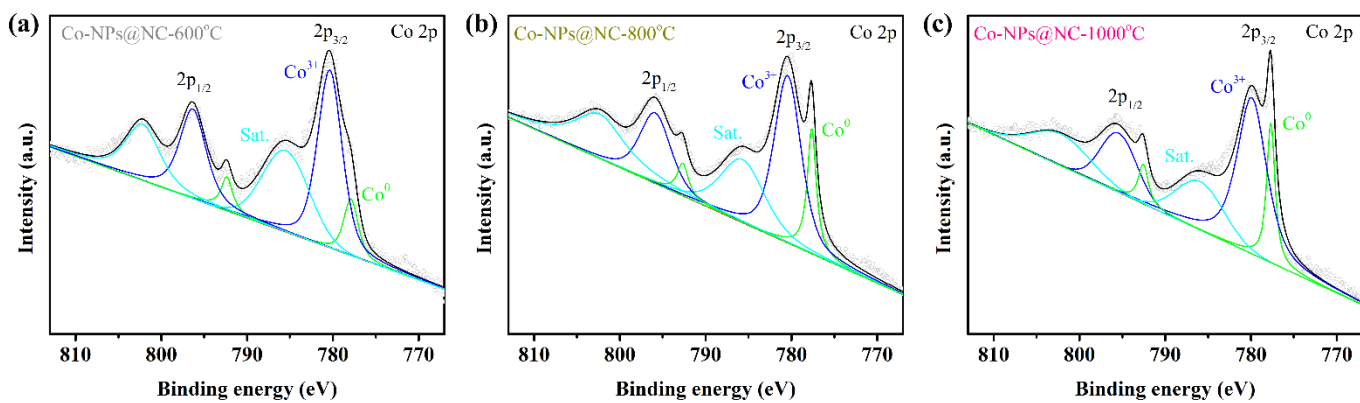

**Figure S8.** The high-resolution Co 2p spectra of a) Co-NPs@NC-600, b) Co-NPs@NC-800, and c) Co-NPs@NC-1000.

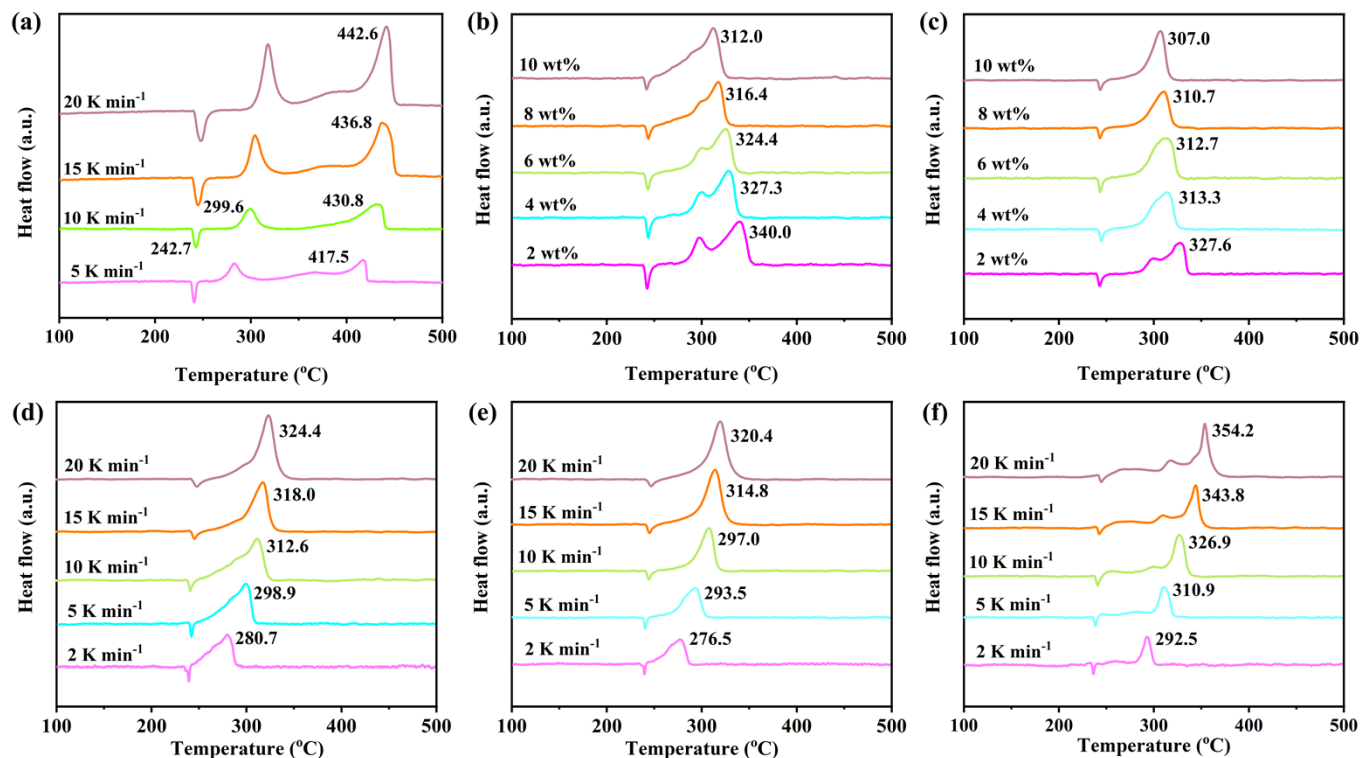

**Figure S9.** a) The DTA curves of pure AP at different heating rates. The DTA curves of AP with different contents of b) Co-NPs@NC-600, c) Co-NPs@NC-1000 at a heating rate of 10 K min<sup>-1</sup>. The DTA curves of AP with 10 wt% d) Co-NPs@NC-600, e) Co-NPs@NC-1000, and (f) ZIF-67 at different heating rates.

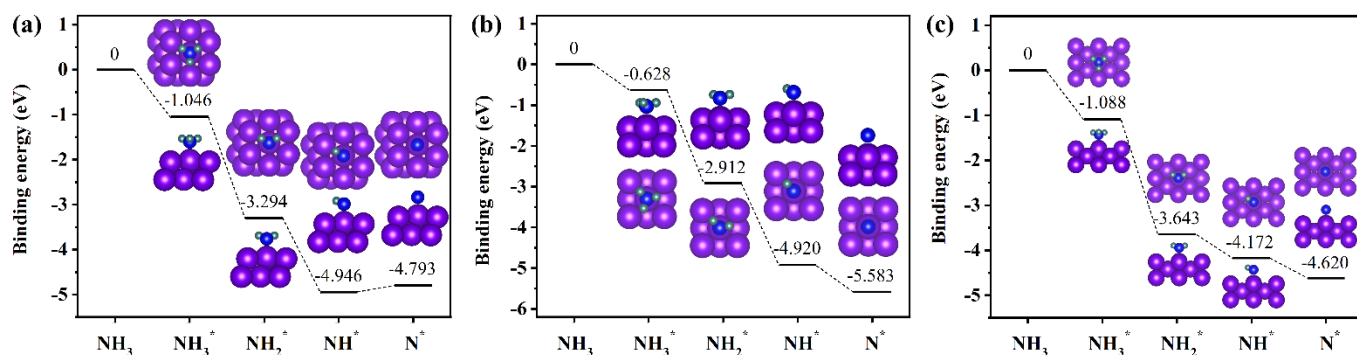

**Figure S10.** The binding energy and optimized structures of NH<sub>3</sub> and its dissociated species on a) (111) plane, b) (200) plane, and c) (220) plane of Co-NPs. The violet, blue, and green balls respectively represent Co, N, and H atoms.

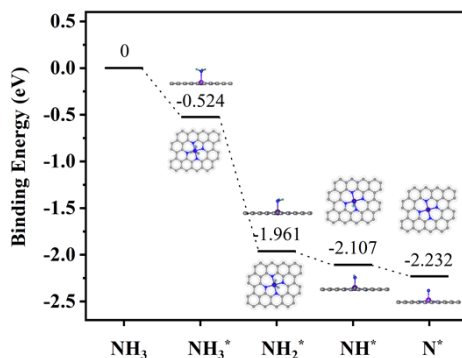

**Figure S11.** The binding energy and optimized structures of NH<sub>3</sub> and its dissociated species on CoN<sub>4</sub> site of Co-SAs@NC. The violet, gray, blue, and green balls respectively represent Co, C, N, and H atoms.

**Table S1.** The element contents of Co-NPs@NC-*T* were measured by XPS and ICP-OES.

| Catalysts      | XPS          |                |                    | ICP-OES      |
|----------------|--------------|----------------|--------------------|--------------|
|                | Carbon (at%) | Nitrogen (at%) | Cobalt (at%)/(wt%) | Cobalt (wt%) |
| Co-NPs@NC-600  | 82.5         | 12.3           | 5.2/26.4           | 37.8         |
| Co-NPs@NC-800  | 92.0         | 5.3            | 2.7/13.5           | 43.3         |
| Co-NPs@NC-1000 | 96.7         | 1.3            | 2.0/10.0           | 56.9         |

**Table S2.** The HTD peak integral area of pure AP, ZIF-67, and Co-NPs@NC-*T*/AP

| Catalysts      | Content (wt%) | Heating rate (K min <sup>-1</sup> ) | Integral area |
|----------------|---------------|-------------------------------------|---------------|
| Pure AP        | /             | 10                                  | 109.1         |
| ZIF-67         | 10            | 10                                  | 372.4         |
| Co-NPs@NC-600  | 10            | 10                                  | 513.3         |
| Co-NPs@NC-800  | 10            | 10                                  | 594.0         |
| Co-NPs@NC-1000 | 10            | 10                                  | 437.6         |

## References

1. Li, X.; Li, Z.; Lu, L.; Huang, L.; Xiang, L.; Shen, J.; Liu, S.; Xiao, D. R. The Solvent Induced Inter-Dimensional Phase Transformations of Cobalt Zeolitic-Imidazolate Frameworks. *Chemistry-A European Journal* **2017**, *23* (44), 10638-10643 DOI: 10.1002/chem.201701721.
2. Kissinger, H. E. Reaction kinetics in differential thermal analysis. *Analytical Chemistry* **1957**, *29* (11), 1702-1706. DOI: 10.1021/ac60131a045
3. Kresse, G.; Furthmüller, J. Efficient iterative schemes for ab initio total-energy calculations using a plane-wave basis set. *Physical Review B* **1996**, *54* (16), 11169-11186 DOI: 10.1103/PhysRevB.54.11169.
4. Kresse, G.; Joubert, D. From ultrasoft pseudopotentials to the projector augmented-wave method. *Physical Review B* **1999**, *59* (3), 1758-1775 DOI: 10.1103/PhysRevB.59.1758.
5. Blöchl, P. E. Projector augmented-wave method. *Physical Review B* **1994**, *50* (24), 17953-17979 DOI: 10.1103/PhysRevB.50.17953.
6. Moellmann, J.; Grimme, S. DFT-D3 Study of Some Molecular Crystals. *The Journal of Physical Chemistry C* **2014**, *118* (14), 7615-7621 DOI: 10.1021/jp501237c.
7. Dudarev, S. L.; Botton, G. A.; Savrasov, S. Y.; Humphreys, C. J.; Sutton, A. P. Electron-energy-loss spectra and the structural stability of nickel oxide: An LSDA+U study. *Physical Review B* **1998**, *57* (3), 1505-1509 DOI: 10.1103/PhysRevB.57.1505.
8. Shojaee, K.; Haynes, B. S.; Montoya, A. The catalytic oxidation of NH<sub>3</sub> on Co<sub>3</sub>O<sub>4</sub>(110): A theoretical study. *Proceedings of the Combustion Institute* **2017**, *36* (3), 4365-4373 DOI: 10.1016/j.proci.2016.06.100.
9. Liechtenstein, A. I.; Anisimov, V. I.; Zaanen, J. Density-functional theory and strong interactions: Orbital ordering in Mott-Hubbard insulators. *Physical Review B* **1995**, *52* (8), R5467-R5470 DOI: 10.1103/PhysRevB.52.R5467.
